# Supplementary material for: Liver ChIP-seq analysis in FGF19-treated mice reveals SHP as a global transcriptional partner of SREBP-2
Source: PubMed Central journal article supplement (PMC4669652; doi:10.1186/s13059-015-0835-6), 2015-12-04

**Figure. S1**

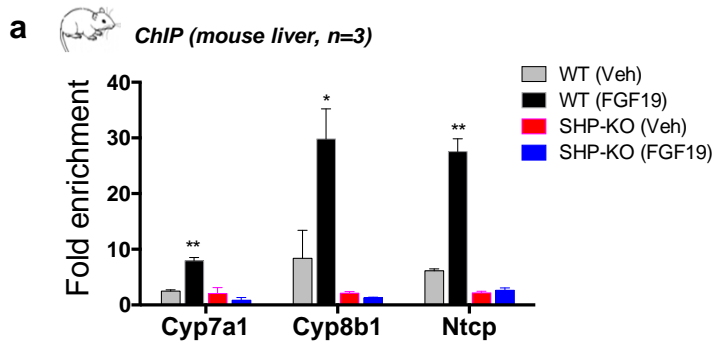

**b**

| Treatment | Group | Unique Mapped Reads | Total Reads |
|-----------|-------|---------------------|-------------|
| Veh       | Input | 16,743,814          | 22,029,930  |
| FGF19     | Input | 17,849,172          | 23,247,293  |
| Veh       | Shp   | 17,968,561          | 32,763,382  |
| FGF19     | Shp   | 16,301,598          | 25,068,418  |

**Figure. S2**

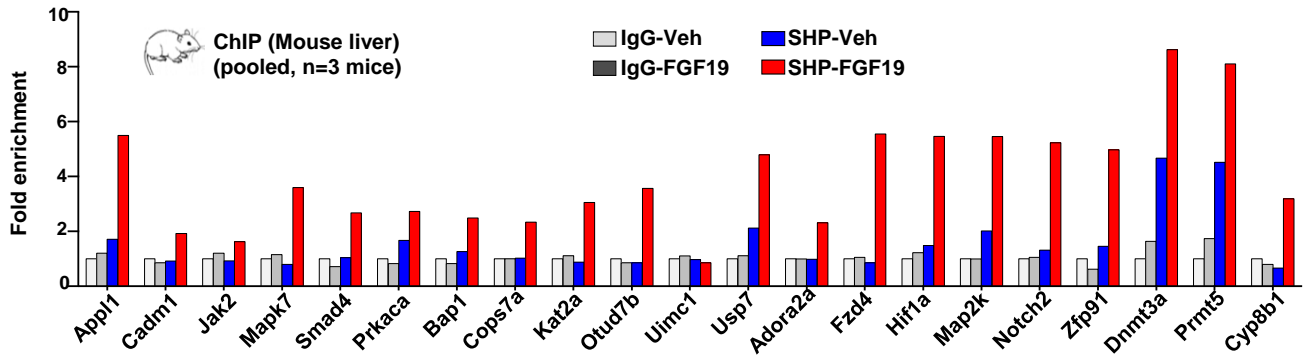

**Figure. S3**

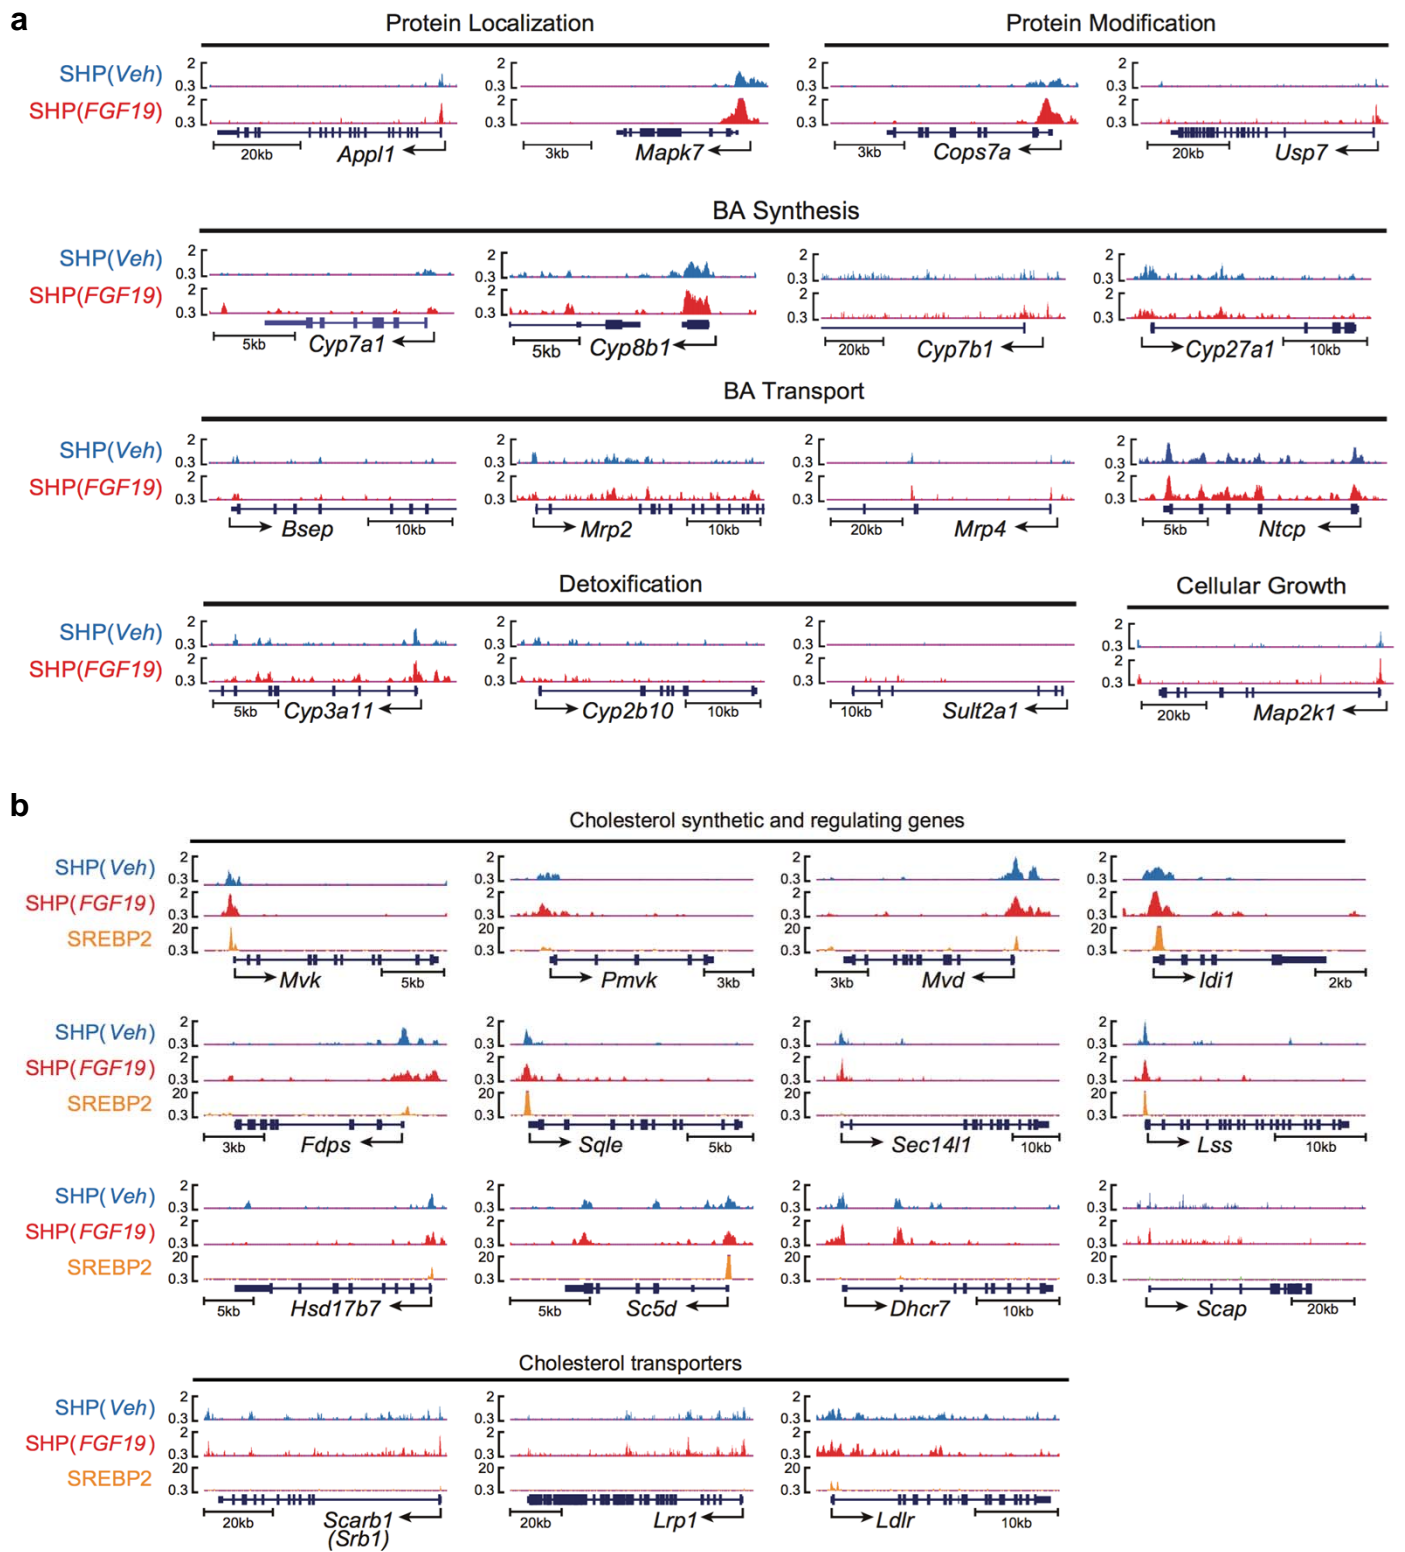

**Figure. S4**

GO analysis of SREBP2 and SHP (Veh / FGF19) shared binding

| Gene Ontology Term                        | Gene count (Total) | P-value   |
|-------------------------------------------|--------------------|-----------|
| cellular metabolic process                | 380 (6562)         | 5.15E-143 |
| cellular macromolecule metabolic process  | 299 (4787)         | 4.40E-113 |
| nitrogen compound metabolic process       | 222 (3803)         | 2.41E-78  |
| regulation of cellular metabolic process  | 224 (3874)         | 2.63E-68  |
| cellular biosynthetic process             | 186 (3016)         | 1.40E-65  |
| RNA metabolic process                     | 156 (2328)         | 4.83E-60  |
| transcription, DNA-dependent              | 124 (1738)         | 4.74E-48  |
| macromolecule modification                | 116 (1794)         | 4.83E-38  |
| response to stimulus                      | 220 (6440)         | 3.01E-34  |
| developmental process                     | 157 (3511)         | 1.27E-28  |
| organelle organization                    | 89 (1522)          | 1.35E-28  |
| localization                              | 141 (3226)         | 2.03E-26  |
| multicellular organismal development      | 145 (3197)         | 3.23E-26  |
| negative regulation of biological process | 116 (2315)         | 8.17E-26  |
| transport                                 | 119 (2638)         | 6.79E-24  |
| cell cycle                                | 55 (815)           | 8.65E-21  |

**Figure. S5**

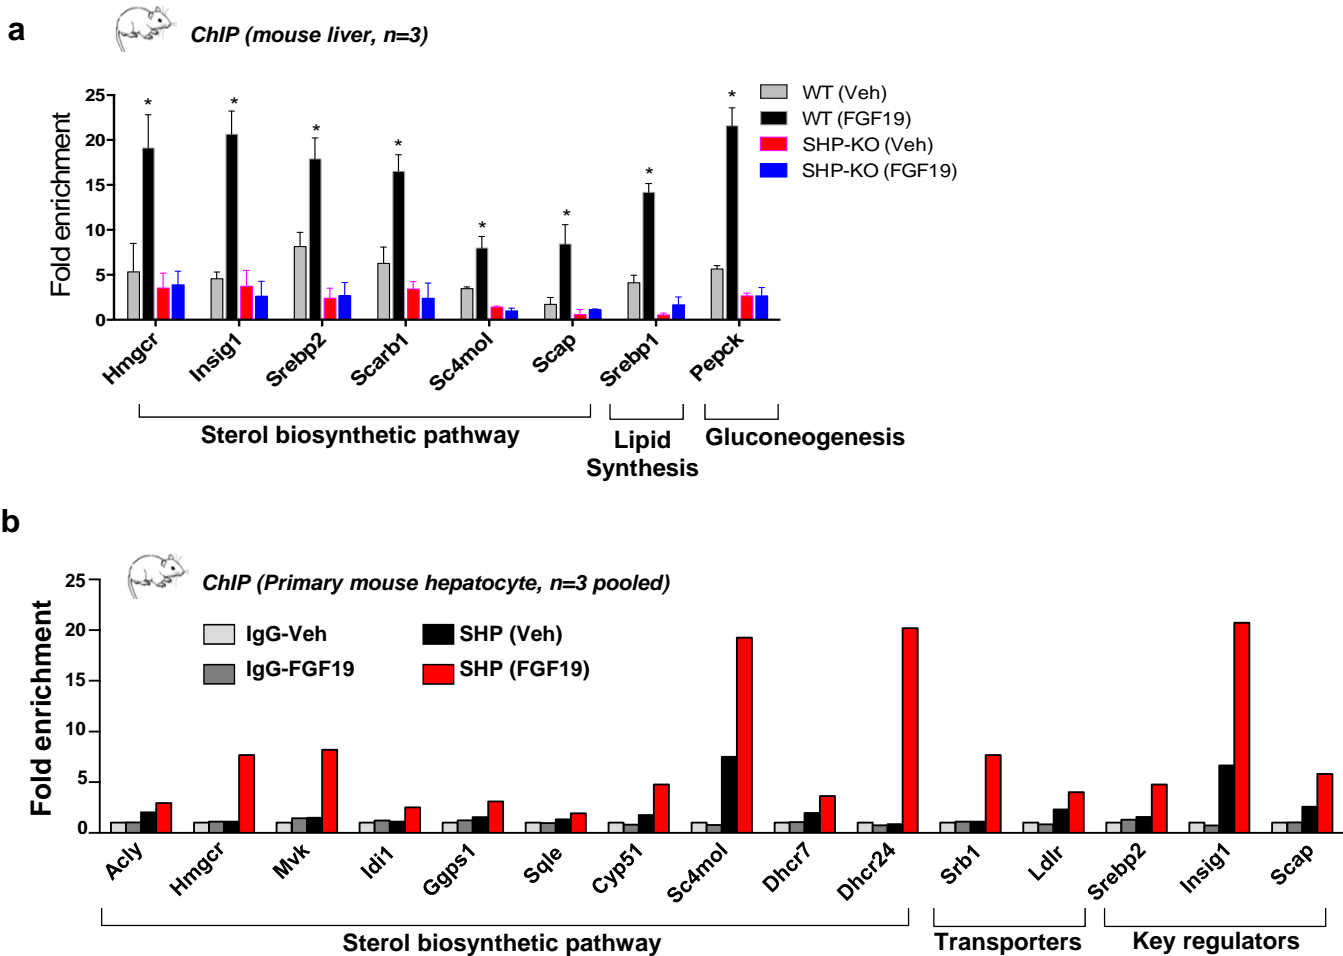

Figure. S6

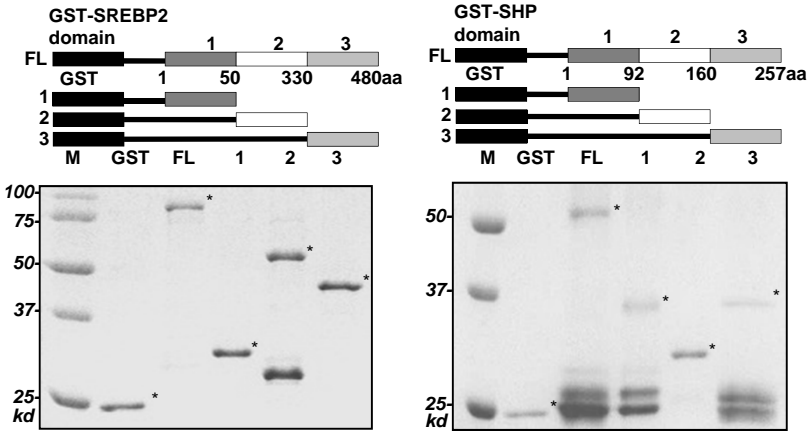

Supplement: 13059_2015_835_MOESM1_ESM.pdf [file 13059_2015_835_MOESM1_ESM.pdf]
