# Supplementary material for: Liver ChIP-seq analysis in FGF19-treated mice reveals SHP as a global transcriptional partner of SREBP-2
Source: PubMed Central journal article supplement (PMC4669652; doi:10.1186/s13059-015-0835-6), 2015-12-04
Supplement: 13059_2015_835_MOESM2_ESM.pdf [file 13059_2015_835_MOESM2_ESM.pdf]

**Table. S1** Comparison between MEME\_ChIP and peak-motifs for prediction of interacting transcription factors

| Veh                   |                       | FGF19                 |                       |
|-----------------------|-----------------------|-----------------------|-----------------------|
| MEME-ChIP             | peak-motifs (RSAT)    | MEME-ChIP             | peak-motifs (RSAT)    |
| SP1/KLF5 (1e-131)     | SP1/KLF5 (1e-046)     | SP1/KLF5 (2.5e-256)   | SP1/KLF5 (2.1e-068)   |
| FOXP1 (6.1e-123)      | FOXP1 (2.6e-007)      | FOXP1 (5.8e-315)      | FOXP1 (3.9e-010)      |
| YY1/SRE (5.7e-095)    | YY1/SRE (5.0e-017)    | YY1/SRE (2.3e-131)    | YY1/SRE (1.9e-024)    |
| ZBTB33 (1.1e-068)     | ZBTB33 (9.0e-013)     | ZBTB33 (6.9e-025)     | -                     |
| RUNX2 (2.6e-023)      | -                     | RUNX2 (4.1e-059)      | -                     |
| NRF1 (3.5e-017)       | NRF1 (6.8e-015)       | NRF1 (3.7e-067)       | NRF1 (2.8e-026)       |
| GABPA/ELK4 (2.3e-008) | GABPA/ELK4 (8.6e-009) | -                     | GABPA/ELK4 (2.8e-013) |
| USF1 (7.8e-006)       | -                     | USF1 (1.1e-019)*      | -                     |
| -                     | -                     | ZNF263 (2.4-150)      | -                     |
| NFYA/NFYB (2.5e-002)* | NFYA/NFYB (8.5-009)   | NFYA/NFYB (1.9e-016)* | NFYA/NFYB (9.1e-023)  |
| -                     | RFX1 (9e-004)         | RFX1 (5.6e-015)*      | -                     |

**Table. S2****a List of mouse gene primer sequences for  
ChIP q-PCR analysis**

| Definition | Sense Primer               | Anti-sense Primer    |
|------------|----------------------------|----------------------|
| App1       | TTCAATGGGCAGCTTGTCGA       | TCGACATCCCCACACTGCT  |
| Cadm1      | ATATTTGCATAGGCCCCGC        | AAAGGAGCAACAGCAGGAG  |
| Jak2       | AAGCTGAGGCAGAGCAGAAA       | GGCTAAGGGGAAAGCAGGA  |
| Mapk7      | AAAACCGCGCCCTTGTCAT        | GGAGGCTGCTAGTACGCAT  |
| Smad4      | GATCTCTCACTCTGTCCCT        | CAACTCGAAATTCGCCCT   |
| Prkaca     | GACAGAGGACTTGGGCTGA        | CCGCACGCAGTGAAGATCA  |
| Bap1       | GCTCGCTGCTGATGATGA         | CCAGCCAGCCCTTATTCAT  |
| Adora2a    | GCTGGTTTCGAAGTCGCCT        | TGGTTCGCTCAGACCTCCA  |
| Cops7a     | CATGGTGTCTACCGGACGA        | GAGGTGGCAGGAAAGGCTT  |
| Kat2a      | AGGAGTCGAAGTTGGGGCA        | GTATGGAAGGCCAAAGGATG |
| Otud7b     | TCCCAGCTCCCGCTCAAAA        | GAGCTGGCCTCTTCCCAAT  |
| Uimc1      | AAGCTCGGATAGCAAGAGAG       | CAGGAACTGTGTGAGCATA  |
| Usp7       | GCTCGCTCTCAAAATGGC         | TCCTTGTCACGCCAGTT    |
| Fzd4       | CTTTCATTGGACAGTCGCGT       | GAATGTGCGGGATATCAGAC |
| Hif1a      | TCCTTACCATTGGCTCTC         | TTGTCAAGGCCCTGGCTAGA |
| Map2k      | CAGCCCCAGCTTGAGAAA         | GACCTGCGTGCAAGAACCT  |
| Notch2     | AACTTTCAGCCAAACTTCGG       | AGAGACAGAGAGGGATGGT  |
| Zfp91      | CCTTCTGCTCTGGCCTTT         | TTCAGAGACTTTCATCCGGC |
| Dnmt3a     | <i>CTGTCCCTACGACCAGTGC</i> | GCCTCTTCTCTCCGCCTTC  |
| Prmt5      | GTCGCCTTAACAACCAGAGC       | GGAGTACCAGTCCCAACGAG |
| Cyp7a1     | ATATGCACAGGACCATGATC       | CTTTGGTAGGTGAGCTCTTC |
| Cyp8b1     | AAGCATGGGGATGTGTTTAC       | CAAACCTGCGGAACTCCATG |
| Acly       | CAGGAAGCTTAGTGGGTA         | CAGCCTCGTAGTTCTCCT   |
| Hmgcr      | CTCGGCTCGGAGACCAATA        | GCGGAAGGAACTGCGCTTA  |
| Mvk        | AGCACGTCATCGGTGTGAT        | TGGGAACCTCAAGCAAGCC  |
| Idi1       | ACTGTAGTTGTGAGAGCGC        | CGCCCTTAACAGCATATC   |
| Ggps1      | CTCACGGTTCACGATGAT         | GTAGTCCAGTCTTCTAGGC  |
| Sqle       | TCTAGCCCGTGATCATCCA        | GTAACCAGAGTAACCGCTG  |
| Cyp51      | TAGACGAGGCTGAGAGTGAA       | GCGATCATTTGTGAGCCAT  |
| Sc4mol     | CTCGCCTGTCGTAATTGGT        | GGGTTCTGGATGAAGCCAA  |
| Dhcr7      | TCATAGCCCAGCTTCTGCA        | AGCCTTCAAGCAAGCCAGT  |
| Dhcr24     | TGCTCTTTCTGCTCTGGGT        | TTTCTAGGCACTGCGCATG  |
| Srb1       | TGAAGGAGACGGAGACAGA        | ACCAGCAACCACCAGGAAA  |
| Ldlr       | AGCTTCAGGGGTTAAAAGAG       | CGGTGCTCATCCTTAGCTT  |
| Srebp2     | AGCCTATCCCAGAATGTTAG       | TGTTGTCAATGGGACCAGG  |
| Insig1     | GGATAGGCTGGGTGAGGTCA       | TGCATCCTGTGGTCCCGCT  |
| Scap       | AGGAGTTGAGAGGTGAAGG        | AACCCCAAAGCAGGATCCA  |

**b List of mouse gene primer sequences for  
q-RTPCR analysis**

| Definition | Sense Primer         | Anti-sense Primer     |
|------------|----------------------|-----------------------|
| 36B4       | CGACATCACAGAGCAGGC   | CACCGAGGCAACAGTTGG    |
| Acly       | TGTTGACATTGGAGCCCTC  | GATACAGCCCTTGCTTCAG   |
| Hmgcr      | TGTCCTTGATGGCAGCCTT  | AAGCTGCCTTCTTGGTGCA   |
| Mvk        | AAGCCAGGTCTAGAGCAAG  | TGGTCTCCAGCAGTCAAA    |
| Idi1       | TGAAAGCCGAGTTGGGAAT  | ATGTTCAACCCAGATACCA   |
| Ggps1      | AATCACTGGCTGAAAGTTCC | AACCACGTGCGAGCTTTGA   |
| Sqle       | TAAACTTGGTGGAGAGTGTG | CGTAGATTGCAACGGAAAAG  |
| Cyp51      | TTACAGGATAACCCAGCATC | GCATAGTCGACCAAAATTGTC |
| Sc4mol     | ATCACGTAATTCTCCTGTGG | GTGGAATCATGGTGCCGA    |
| Dhcr7      | CCTACCTCTACACTGCA    | TAGTAACCCACGAGGCCAA   |
| Dhcr24     | AGCCACGTGTGAAGCACTT  | AGCCATCGAACATCTCCCA   |
| Srb1       | TGCTGTGGTTCGAACAGAGC | GCCTGAATGGCCTCCTTATC  |
| Ldlr       | GCCCCAACAAGTTCAAGTGT | TGGTCTTGCACTCCTTGATG  |
| Srebp2     | GAACACCAAGCATGGAGAG  | GACAGGAAAAGAGAGGGGAA  |
| Insig1     | GAGGTGTCACAGTGGGAAA  | CCACTCTGAACCATGTGCT   |
| Scap       | AGCCAAGACCATACTCTAAG | TCCATCTTGTCTCCACTG    |
